# Supplementary material for: MEGF11 Activates RAD52‐Dependent ALT through the NELL2‐PAX7 Transcriptional Cascade during Malignant Transformation of MPNSTs
Source: Preprints.org preprint supplement (doi:10.20944/preprints202410.1142.v1), 2024-10-15
Supplement: Supplementary file 1 [file supplementary]

## Sheet: SI 7
Supplementary Information 7. MEGF11-ephrin signaling is transduced to PARD6B and PDZD9.
	PDZ
	AHNAK								AHNAK2								APBA1								APBA2								APBA3								ARHGEF11								ARHGAP21
	Linear regression				GLM				Linear regression				GLM				Linear regression				GLM				Linear regression				GLM				Linear regression				GLM				Linear regression				GLM				Linear regression
	Δ		MPNST		Δtelomere		MPNST-telomere		Δ		MPNST		Δtelomere		MPNST-telomere		Δ		MPNST		Δtelomere		MPNST-telomere		Δ		MPNST		Δtelomere		MPNST-telomere		Δ		MPNST		Δtelomere		MPNST-telomere		Δ		MPNST		Δtelomere		MPNST-telomere		Δ
	β (95% CI)	P†	β (95% CI)	P†	β (95% CI)	P	β (95% CI)	P	β (95% CI)	P†	β (95% CI)	P†	β (95% CI)	P	β (95% CI)	P	β (95% CI)	P†	β (95% CI)	P†	β (95% CI)	P	β (95% CI)	P	β (95% CI)	P†	β (95% CI)	P†	β (95% CI)	P	β (95% CI)	P	β (95% CI)	P†	β (95% CI)	P†	β (95% CI)	P	β (95% CI)	P	β (95% CI)	P†	β (95% CI)	P†	β (95% CI)	P	β (95% CI)	P	β (95% CI)
MEGF11	-0.179 (-0.362 to 0.003)	0.054	-0.215 (-0.434 to 0.004)	0.054	-2.685 (-103.816 to 98.446)	0.959	-8.278 (-99.673 to 83.118)	0.859	0.218 (-0.149 to 0.585)	0.227	0.050 (-0.238 to 0.339)	0.719	-62.486 (-112.763 to -12.208)	0.015	-13.107 (-64.627 to 38.412)	0.618	0.096 (-0.217 to 0.409)	0.527	-0.024 (-0.228 to 0.181)	0.809	69.524 (-29.602 to 168.649)	0.169	2.669 (-90.023 to 95.362)	0.955	0.362 (-0.190 to 0.915)	0.185	0.076 (-0.315 to 0.466)	0.688	-24.844 (-51.303 to 1.616)	0.066	-15.600 (-33.880 to 2.680)	0.094	0.170 (-0.089 to 0.428)	0.185	-0.080 (-0.282 to 0.122)	0.414	-16.610 (-98.880 to 65.659)	0.692	-15.775 (-88.635 to 57.084)	0.671	0.032 (-0.207 to 0.272)	0.78	-0.001 (-0.263 to 0.261)	0.994	-78.994 (-185.392 to 27.403)	0.146	-45.266 (-144.745 to 54.213)	0.372	0.017 (-0.185 to 0.219)
EPHA6	-0.345 (-0.591 to -0.099)	0.009	-0.261 (-0.596 to 0.074)	0.119	6.400 (-121.269 to 134.069)	0.922	2.125 (-116.078 to 120.328)	0.972	0.222 (-0.331 to 0.775)	0.41	0.077 (-0.348 to 0.502)	0.707	-61.188 (-141.698 to 19.322)	0.136	-6.572 (-86.180 to 73.036)	0.871	-0.046 (-0.512 to 0.420)	0.839	-0.079 (-0.379 to 0.220)	0.584	131.527 (-6.636 to 269.689)	0.062	23.746 (-114.547 to 162.039)	0.736	0.552 (-0.259 to 1.363)	0.17	0.179 (-0.392 to 0.750)	0.52	-29.713 (-70.328 to 10.902)	0.152	-28.489 (-56.579 to -0.398)	0.047	0.327 (-0.039 to 0.694)	0.077	-0.053 (-0.355 to 0.250)	0.719	-13.613 (-113.863 to 86.638)	0.79	-29.167 (-118.642 to 60.308)	0.523	0.004 (-0.350 to 0.358)	0.982	0.021 (-0.365 to 0.407)	0.91	-75.317 (-233.376 to 82.743)	0.35	13.862 (-137.999 to 165.722)	0.858	-0.055 (-0.352 to 0.242)
ALL Ps are controlled by the B-H procedure with FDR=0.25 Transcriptional relationships that passed the control by the B-H procedure with FDR=0.25 are indicated in orange shade. Abbreviations: GLM, generalized linear model; MPNST, malignant peripheral nerve sheath tumor; CI, confidence interval; B-H, Benjamini-Hochberg
[truncated: 1,487 more columns]
